# Supplementary material for: The architecture of the Schizosaccharomyces pombe CCR4-NOT complex
Source: PubMed Central journal article supplement (PMC4737751; doi:10.1038/ncomms10433), 2016-01-25
Supplement: ncomms10433-s1.pdf [file ncomms10433-s1.pdf]

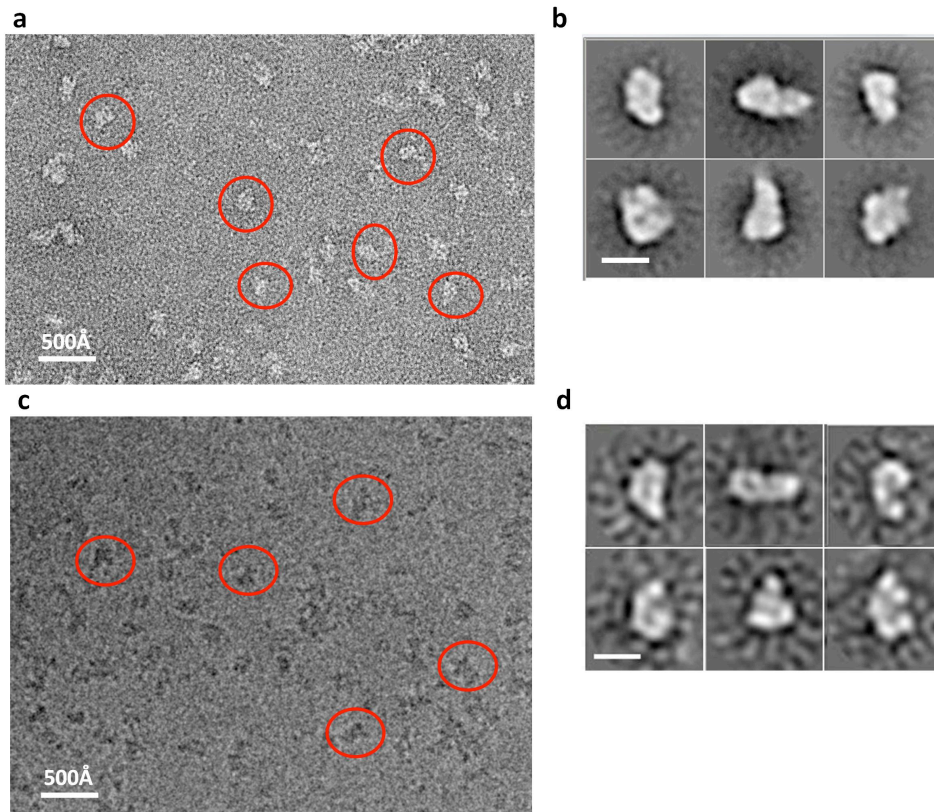

**Supplementary Figure 1. Negative staining and cryo-EM analysis of the CCR4-NOT complex.** **a, c)** Example of negative staining (a) and cryo-EM (c) images of the CCR4-NOT complex with some selected individual particles (red circles). **b, d)** Example of the representative reference-free 2D classes of the two preparations. Bar in b,d) = 100Å.

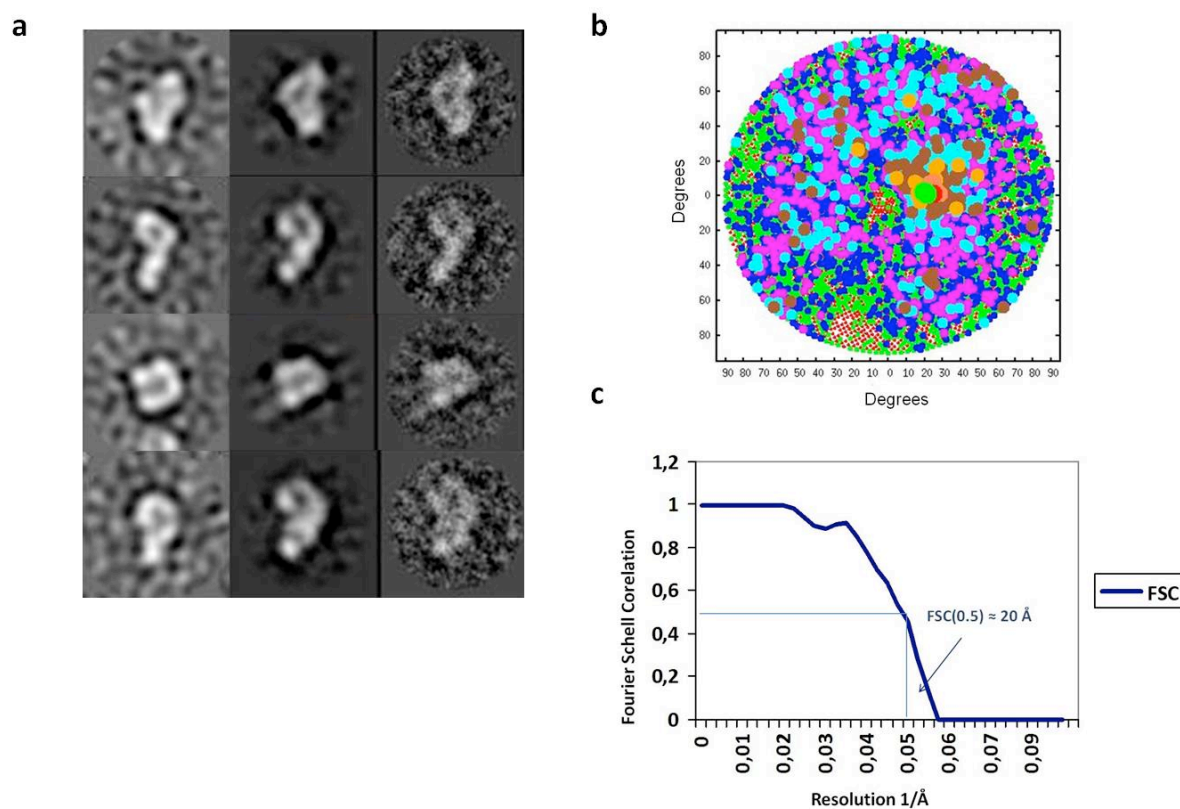

**Supplementary Figure 2. Additional assessment of the quality of the 3D reconstructions.** **a)** The 3D reconstruction quality can be assessed by comparison of the reference-free 2D classes (CL2D, left column), with the 3D map projections and the generated class averages from EMAN (middle and right, respectively), based on the 3D reconstruction of the CCR4-NOT complex. **b)** 2D representation of the angular distribution of the particles used for the 3D reconstruction of the CCR4-NOT complex by Projection Matching. Each circle represents one projection of the final model with the defined angle value. The size is proportional to the number of assigned individual particles. **c)** The computed resolution curve for the CCR4-NOT complex reconstruction. The resolution was estimated to be 20 Å based on the 0.5 criterion.

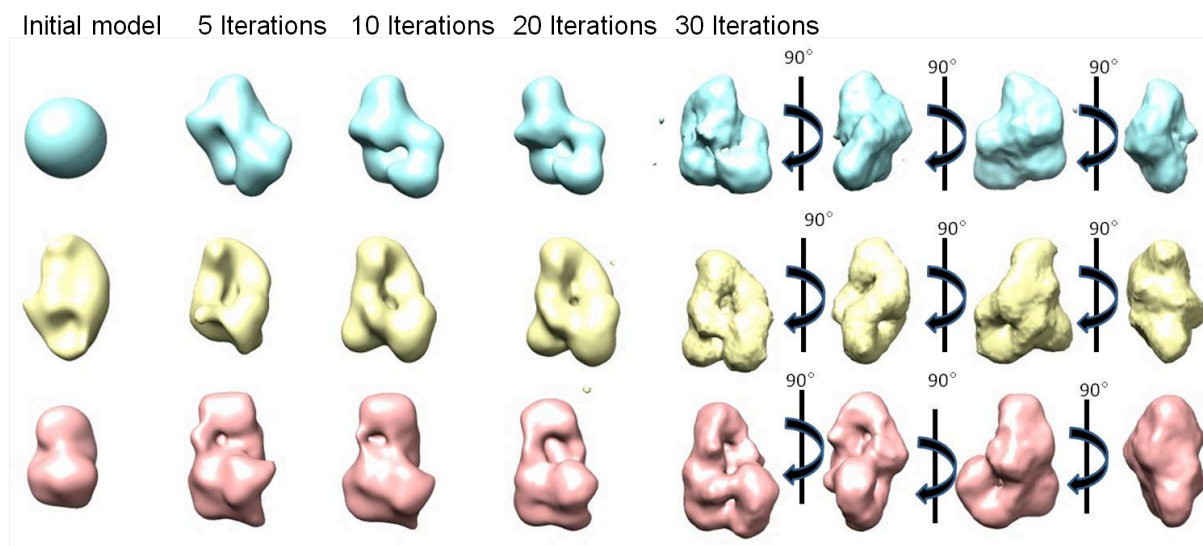

**Supplementary Figure 3. Representation of the iterative angular refinement from the 3D reconstruction of CCR4-NOT using the cryoEM images.** The iterative refinement was performed simultaneously using EMAN, starting from different initial models: blob (blue), “common lines” (yellow) and a highly-filtered volume of the negative staining 3D reconstructions (pink).

# Ccr4-not wt

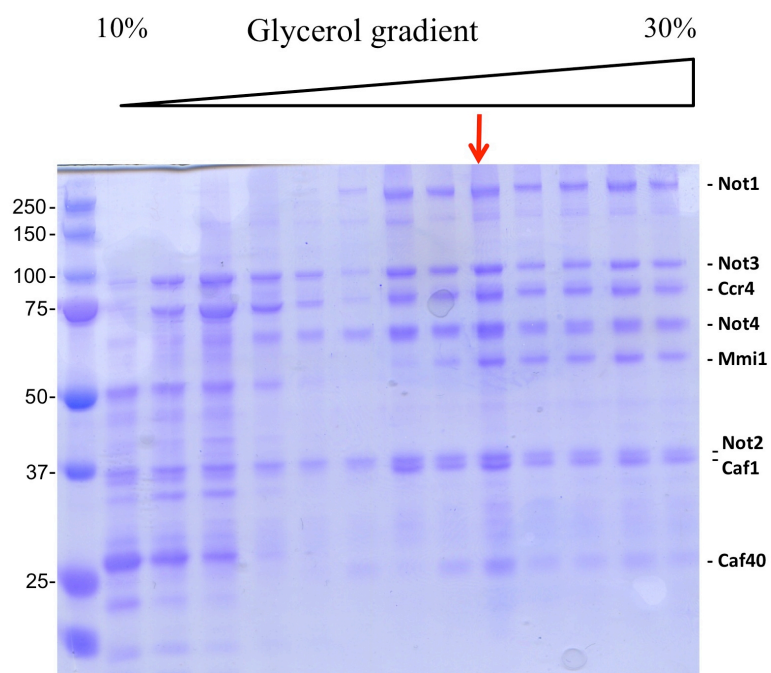

# $\Delta$ Mmi1

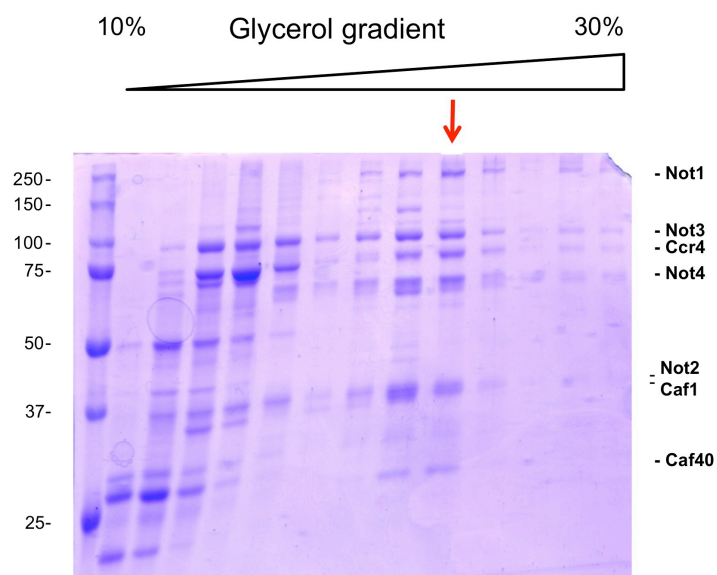

# Not3-GFP

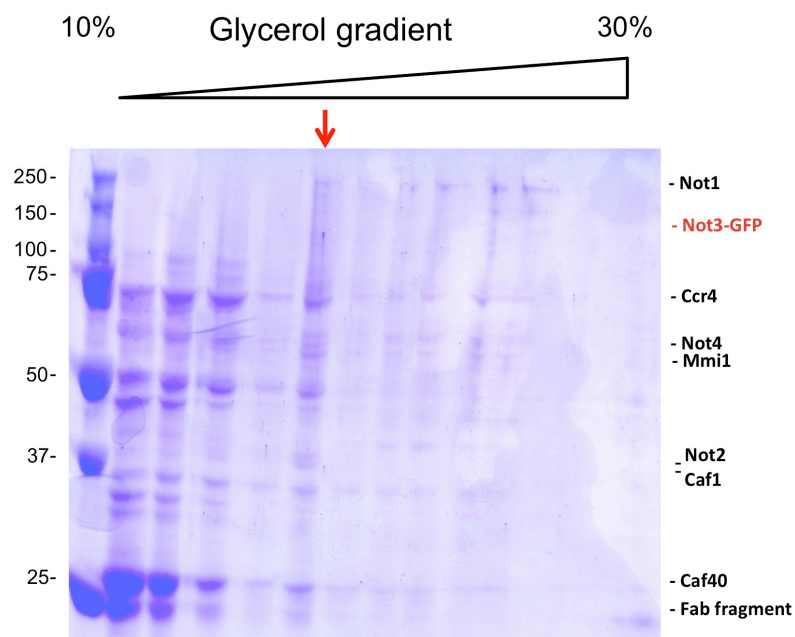

# Not1-GFP

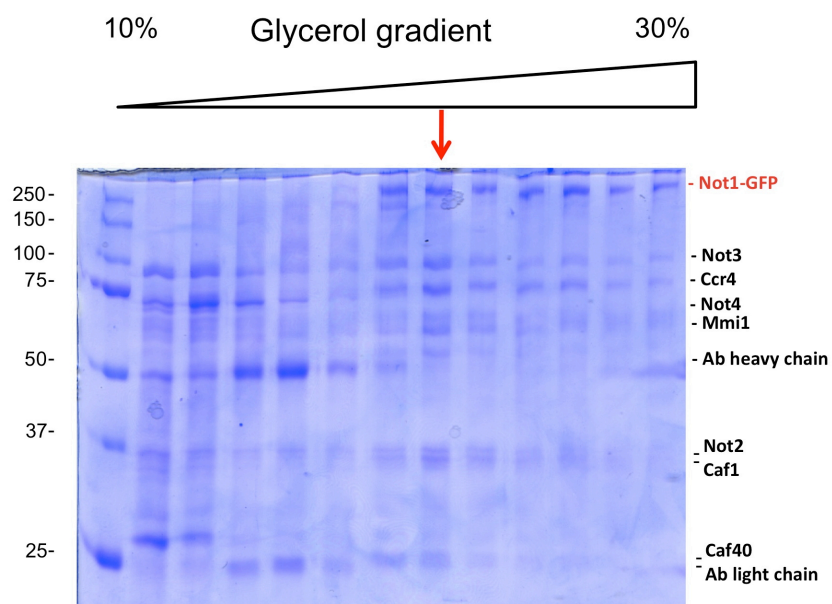

# Ccr4-GFP

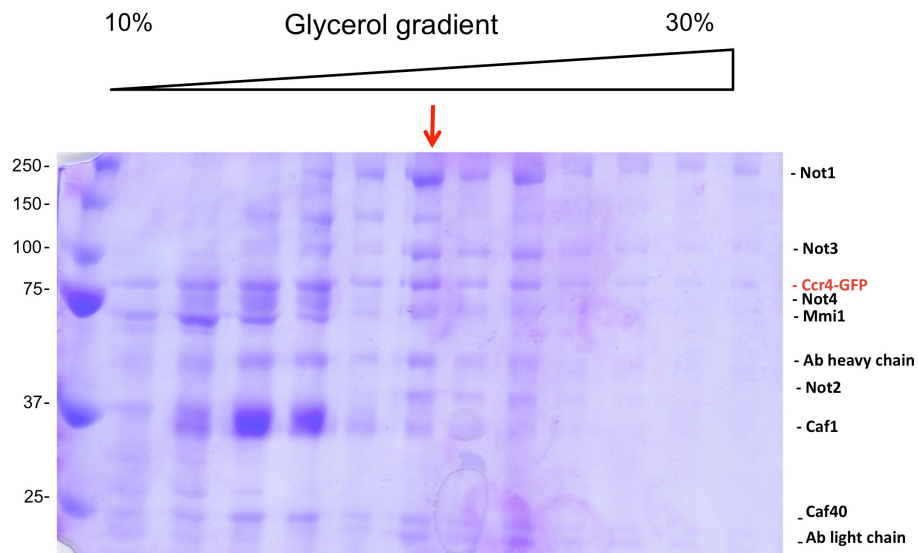

# Not4-GFP

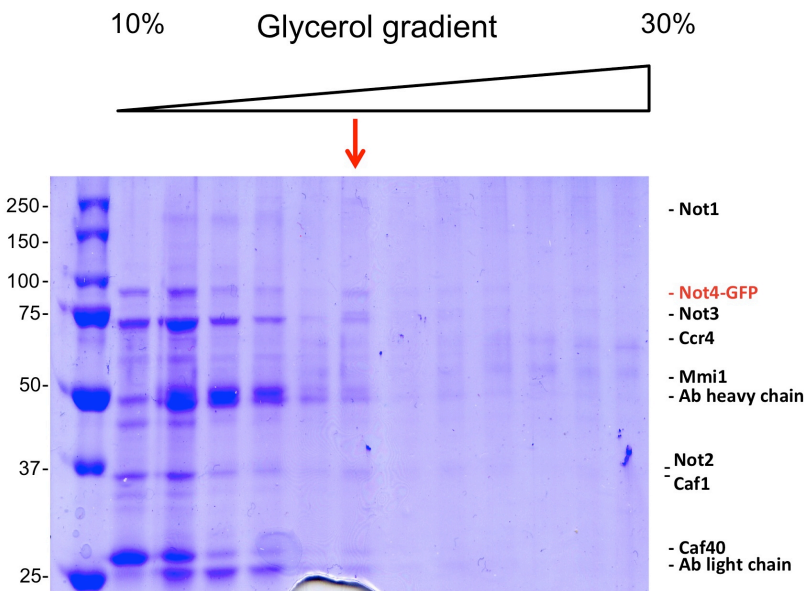

# Caf40-GFP

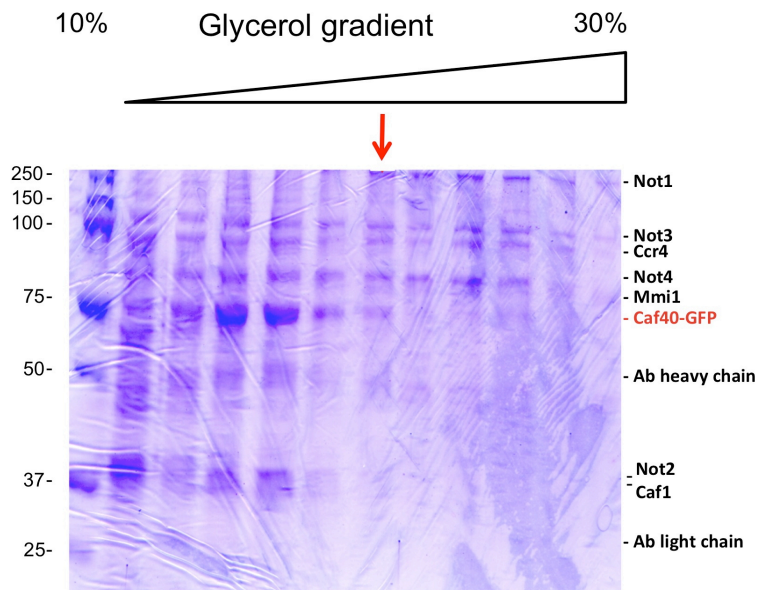

# Caf1-GFP

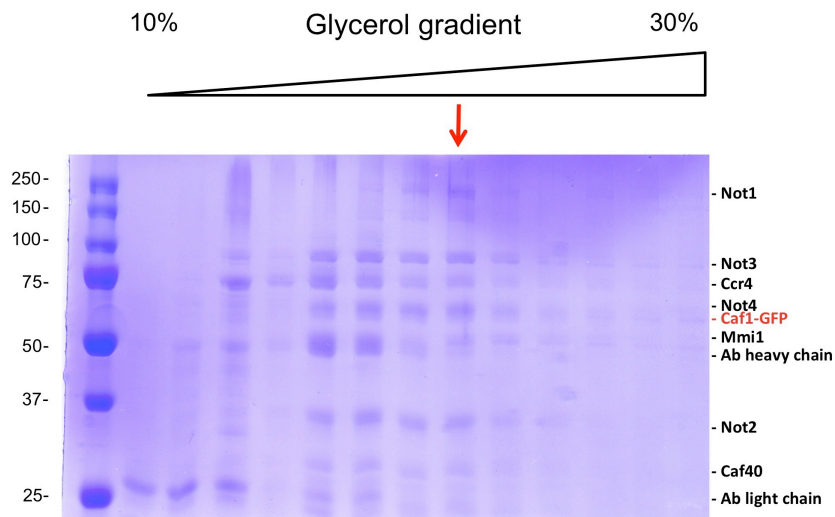

## Supplementary Figure 4. Purification of CCR4-NOT complexes from *Schizosaccharomyces pombe*.

Electrophoretic analysis of the fractions of the glycerol gradients shown in Fig. 1a (the two first gels) and those used for immunolocalization EM. For immunomicroscopy, the CCR4-NOT complex was purified from distinct yeast strains in which different CCR4-NOT subunits were individually fused to a GFP tag and the Not2 subunit in each strain was fused to a TAP tag. The presence of all CCR4-NOT complex components and antibody heavy and light chains are indicated. The lane marked with a red arrow was used for electron microscopy

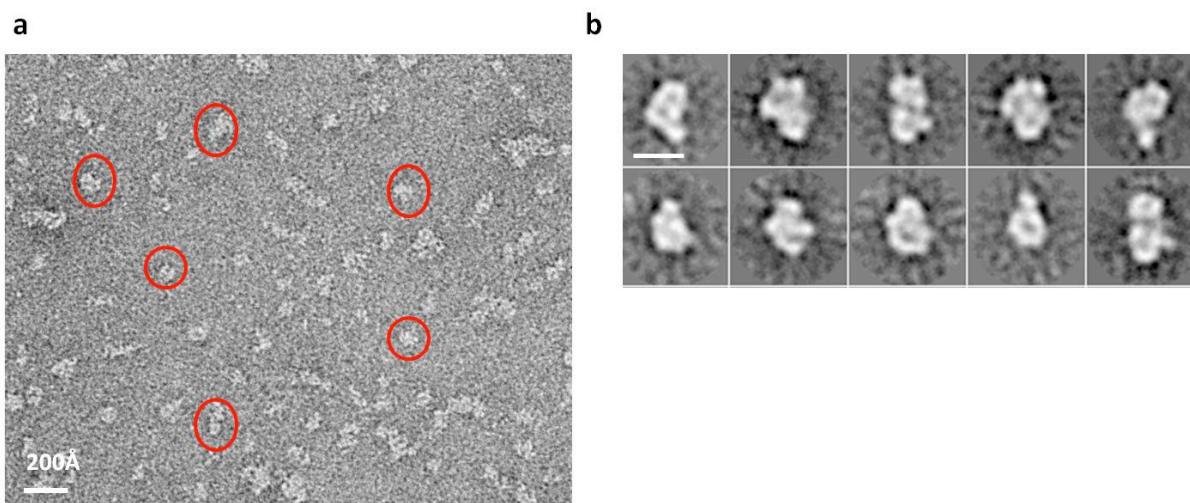

**Supplementary Figure 5. Negative staining EM analysis of the yeast Not2-Not5 heterodimer.** a) An example of a negatively stained image of the Not2-Not5 dimer with some selected individual particles (red circles). b) Example of the representative reference-free 2D classes. Bar in b) = 100 Å.



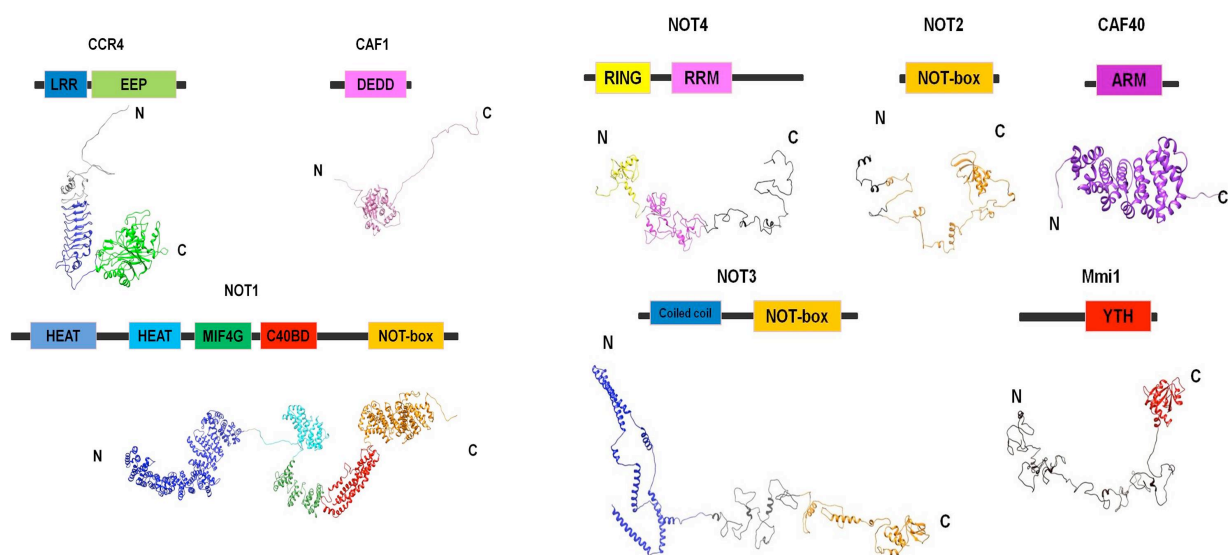

**Supplementary Figure 6. Predicted homology structures of the subunits of the *S. pombe* CCR4-NOT complex.** Schemes above each predicted structure represent domain organization of each subunit.

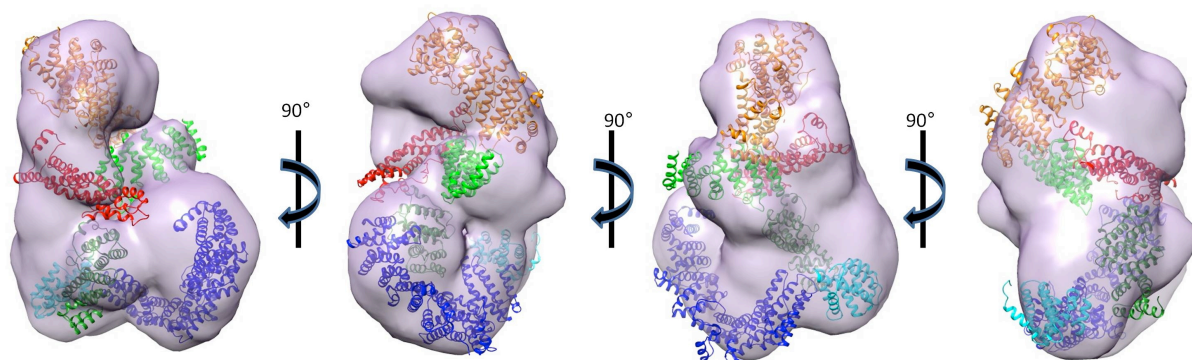

**Supplementary Figure 7. Docking of the homology structure for Not1 into the cryo-EM 3D reconstruction of the CCR4-NOT complex.** Not1 is a scaffold of the CCR4-NOT complex, spans the whole volume and provides a platform for protein-protein interactions. Colors show domain organization: NOT-box (orange), C40BD (red), MIF4G (green), HEAT (light and dark blue).

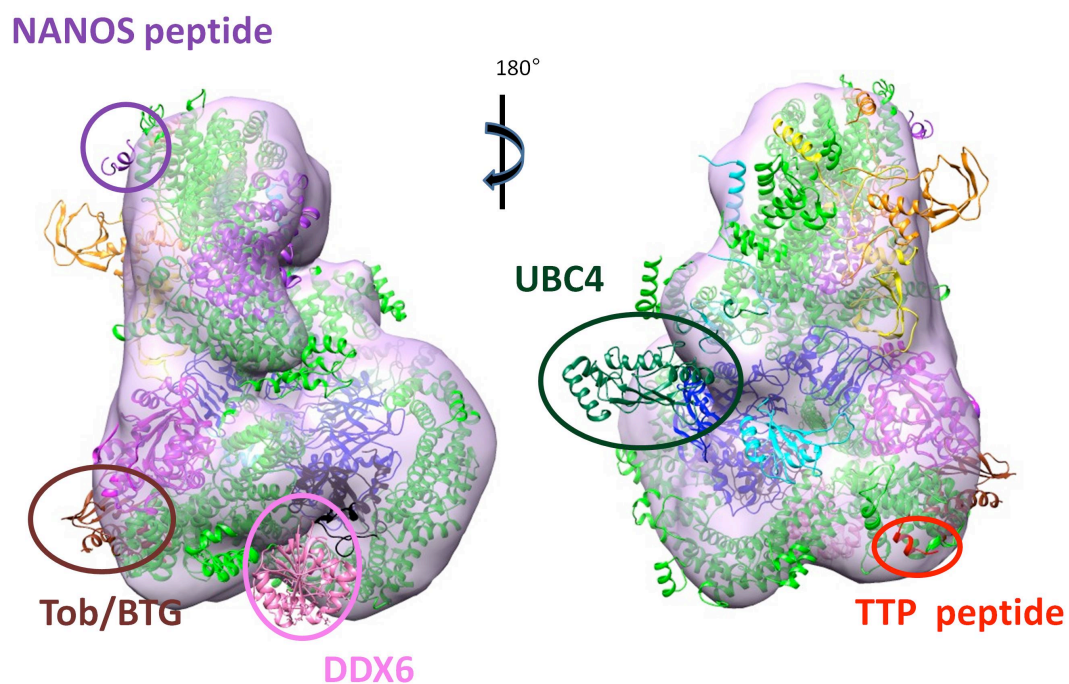

**Supplementary Figure 8. Pseudo-atomic model of the CCR4-NOT complex with the interacting partners.** Crystal structures of the known interacting partners (Nanos, Tob/BTG, DDX6, TTP and Ubc4) and the fragments of the CCR4-NOT complex (4CQO, 2D5R, 4CT4, 4J8S and 5AIE) were superimposed on the pseudo-atomic model showing their binding sites in the context of the entire complex.

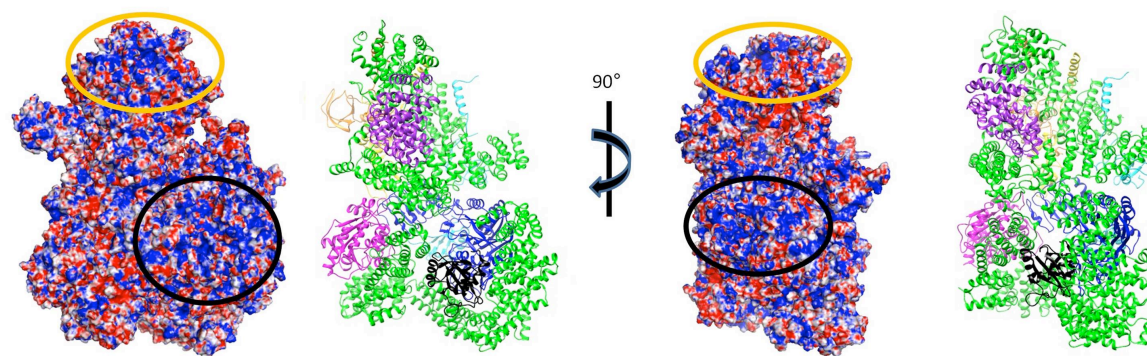

**Supplementary Figure 9. Electrostatic potential of the yeast CCR4-NOT complex.** Different views of the CCR4-NOT complex, electrostatic potential (blue and red represent positive and negative charges, respectively) and views of the corresponding pseudo-atomic model. Subunits: Ccr4 (dark blue), Caf1 (pink), Not1 (green), Caf40 (purple), Not2 (red), Not3 (orange), Not4 (blue), Mmi1 (black). Black and orange circles indicate the Mmi1- and Not-module related patches of positive charge (see main text).

**Supplementary Table 1.** List of *Schizosaccharomyces pombe* strains used in this study

| Name of strain         | Genotype of strain                     |
|------------------------|----------------------------------------|
| NOT2-TAP               | h+ NOT2-TAP::kan                       |
| NOT2-TAP Mmi1-ProteinA | h- NOT2-TAP::kan Mmi1-ProteinA::natMX6 |
| NOT2-TAP NOT3/5GFP     | h+ NOT2-TAP::kan NOT3/5GFP::natMX6     |
| NOT2-TAP NOT4GFP       | h+ NOT2-TAP::kan NOT4GFP::natMX6       |
| NOT2TAP POP2GFP        | h+NOT2TAP::kan POP2GFP::natMX6         |
| NOT2TAP NOT1GFP        | h- NOT2TAP::kan NOT1GFP::natMX6        |
| NOT2TAP CAF40GFP       | h+ NOT2-TAP::kan CAF40GFP::natMX6      |
| NOT2TAP CCR4GFP        | h+ NOT2-TAP::kan CCR4GFP::natMX6       |

**Supplementary Table 2.** Number of single particles selected for each 3D reconstruction

| <b>CCR4-NOT complex characteristic</b> | <b>Number of particles</b> |
|----------------------------------------|----------------------------|
| NOT2-TAP, Negative staining EM         | 10,303                     |
| NOT2-TAP, Mmi1-ProteinA                | 10,331                     |
| NOT2-TAP, NOT1-GFP                     | 21,715                     |
| NOT2-TAP, POP2-GFP                     | 14,700                     |
| NOT2-TAP, CCR4-GFP                     | 15,690                     |
| NOT2-TAP, NOT3-GFP                     | 12,846                     |
| NOT2-TAP, CAF40-GFP                    | 13,280                     |
| NOT2-TAP, NOT4-GFP                     | 17,560                     |
| NOT2-TAP-RNA-nanoGold labeling         | 8,500                      |
| NOT2-TAP, cryo-EM                      | 60,480                     |

**Supplementary Table 3. Description of structures of CCR4-NOT components used in hybrid modeling with the PyRy3D program.**

|                                                                                                                                                                                                                                                                                                                                            |
|--------------------------------------------------------------------------------------------------------------------------------------------------------------------------------------------------------------------------------------------------------------------------------------------------------------------------------------------|
| <b>CCR4</b>                                                                                                                                                                                                                                                                                                                                |
| 1-90 disorder<br>91-150 model, very low accuracy (possible disorder)<br>151-280 model, high accuracy<br>281-317 disorder (linker)<br>318-676 model, high accuracy (low accuracy: 528-548, 583-595)<br>677-690 disorder (linker)                                                                                                            |
| <b>RCD1</b>                                                                                                                                                                                                                                                                                                                                |
| 1-10 disorder<br>11-275 model, very high accuracy<br>276-283 disorder                                                                                                                                                                                                                                                                      |
| <b>CAF1</b>                                                                                                                                                                                                                                                                                                                                |
| 1-22 disorder<br>23-273 model, very high accuracy (X-ray structure)<br>274-335 disorder                                                                                                                                                                                                                                                    |
| <b>NOT1</b>                                                                                                                                                                                                                                                                                                                                |
| 1-35 disorder<br>36-653 model, low accuracy<br>654-655 disorder<br>656-815 model, very high accuracy<br>816-840 disorder<br>841-1090 model, very high accuracy<br>1091-1096 disorder<br>1097-1328 model, high accuracy<br>1329-1567 model, low accuracy<br>1568-1582 disorder<br>1583-2072 model, very high accuracy<br>2073-2100 disorder |
| <b>NOT2</b>                                                                                                                                                                                                                                                                                                                                |
| 1-127 disorder<br>128-306 model, high accuracy                                                                                                                                                                                                                                                                                             |
| <b>NOT3</b>                                                                                                                                                                                                                                                                                                                                |
| 1-490 disorder<br>491-634 model, high accuracy<br>635-640 disorder                                                                                                                                                                                                                                                                         |
| <b>NOT4</b>                                                                                                                                                                                                                                                                                                                                |
| 1-15 disorder<br>16-76 model, high accuracy<br>77-112 disorder<br>113-200 model, high accuracy<br>201-489 disorder                                                                                                                                                                                                                         |
| <b>Mmi1</b>                                                                                                                                                                                                                                                                                                                                |
| 1-349 disorder<br>350-487 model, high accuracy                                                                                                                                                                                                                                                                                             |
